# Supplementary material for: Curative Effects of Fuzheng Huayu on Liver Fibrosis and Cirrhosis: A Meta-Analysis
Source: Hindawi journal article supplement (doi:10.1155/2015/125659), 2015-01-01
Supplement: f1 [file 125659.f1.pdf]

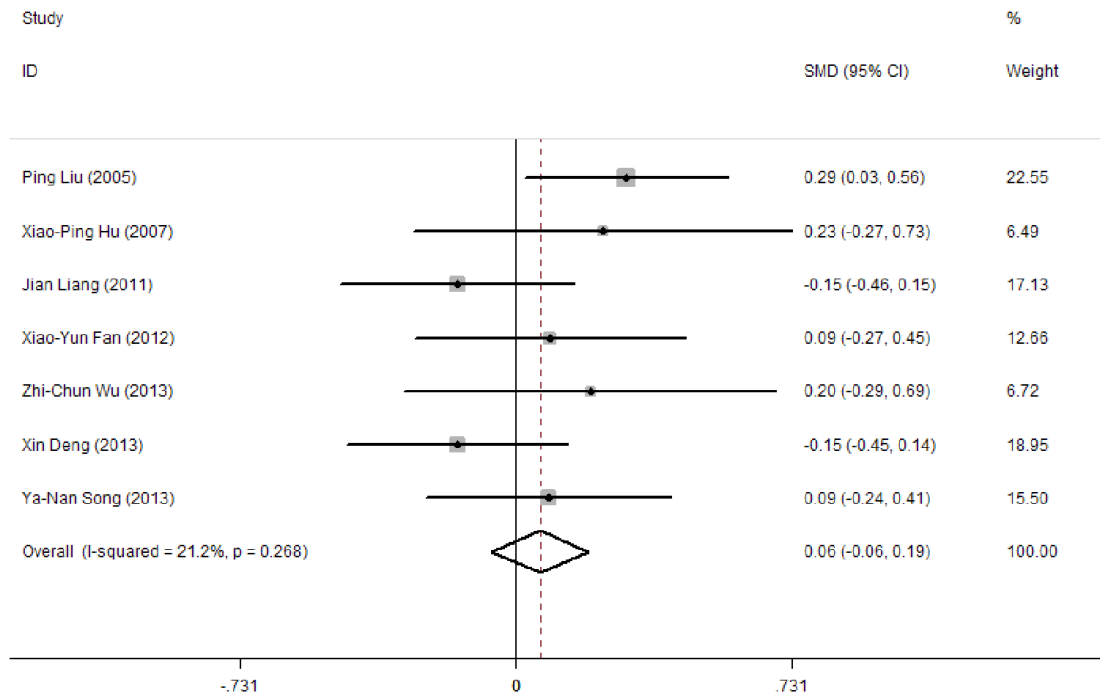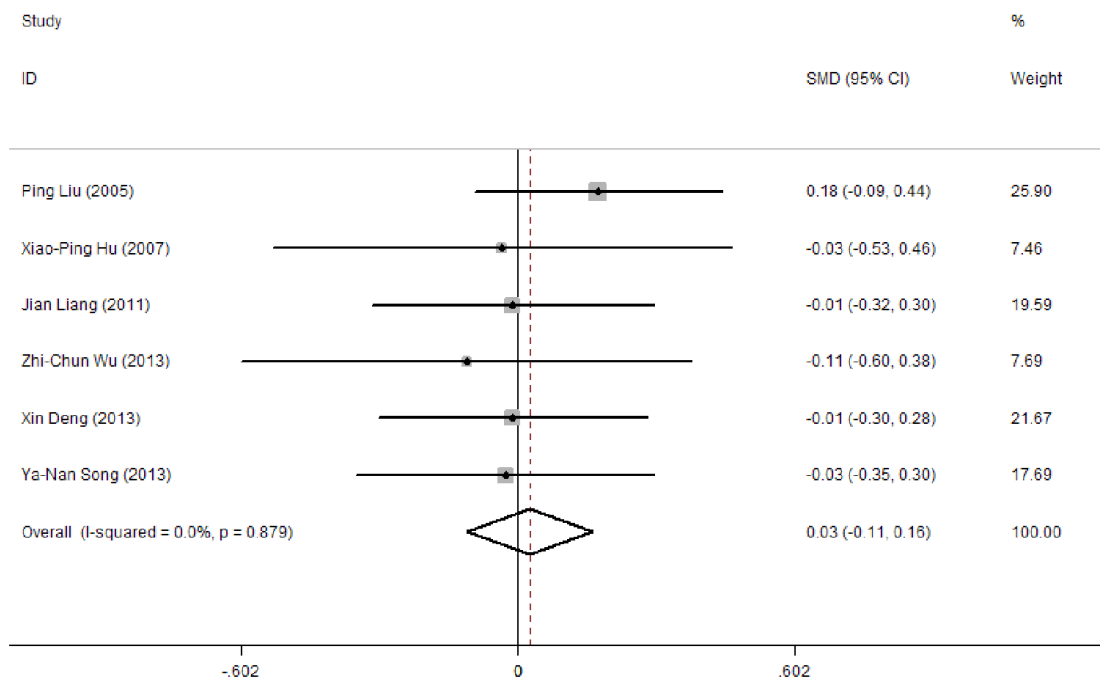

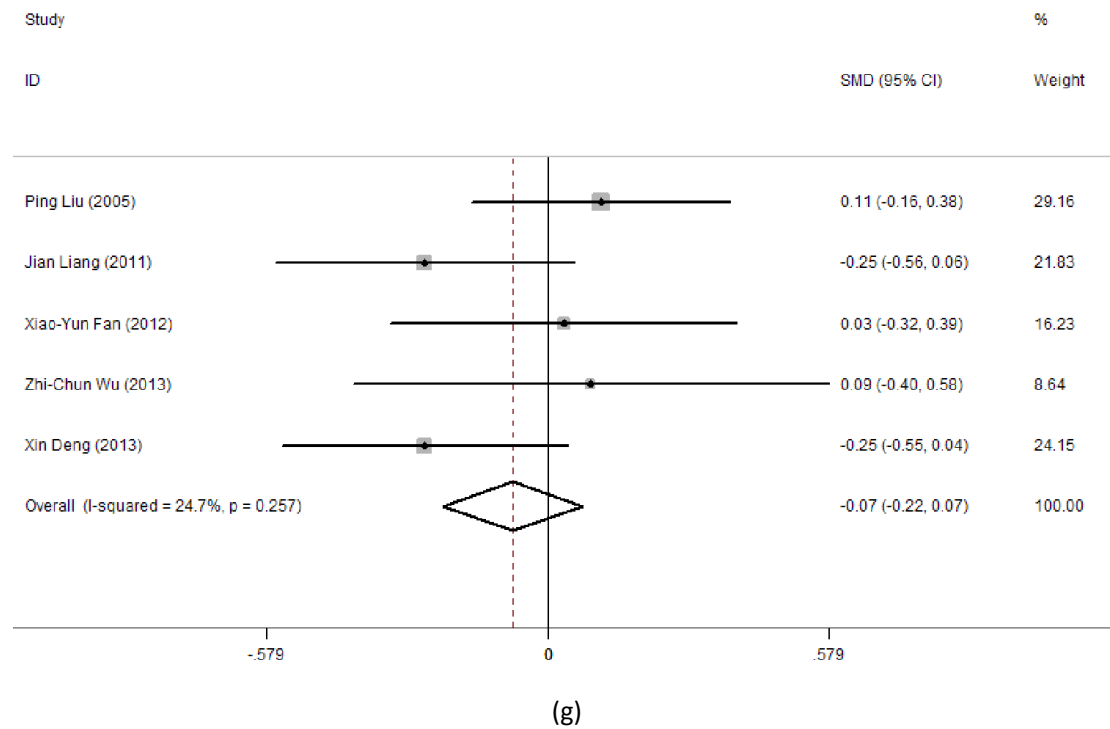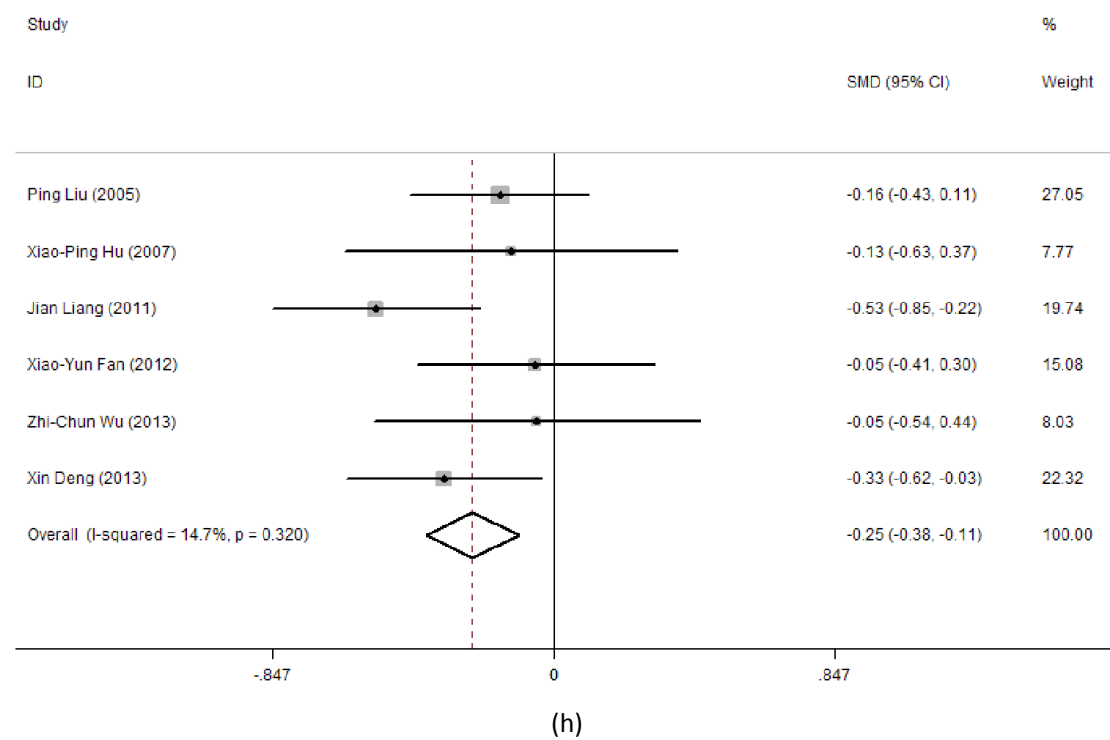

FIGURE 2: Forest plots of ALT, AST, TBil and ALB before treatment. (e), ALT, (f), AST, (g), TBil, (h), ALB.

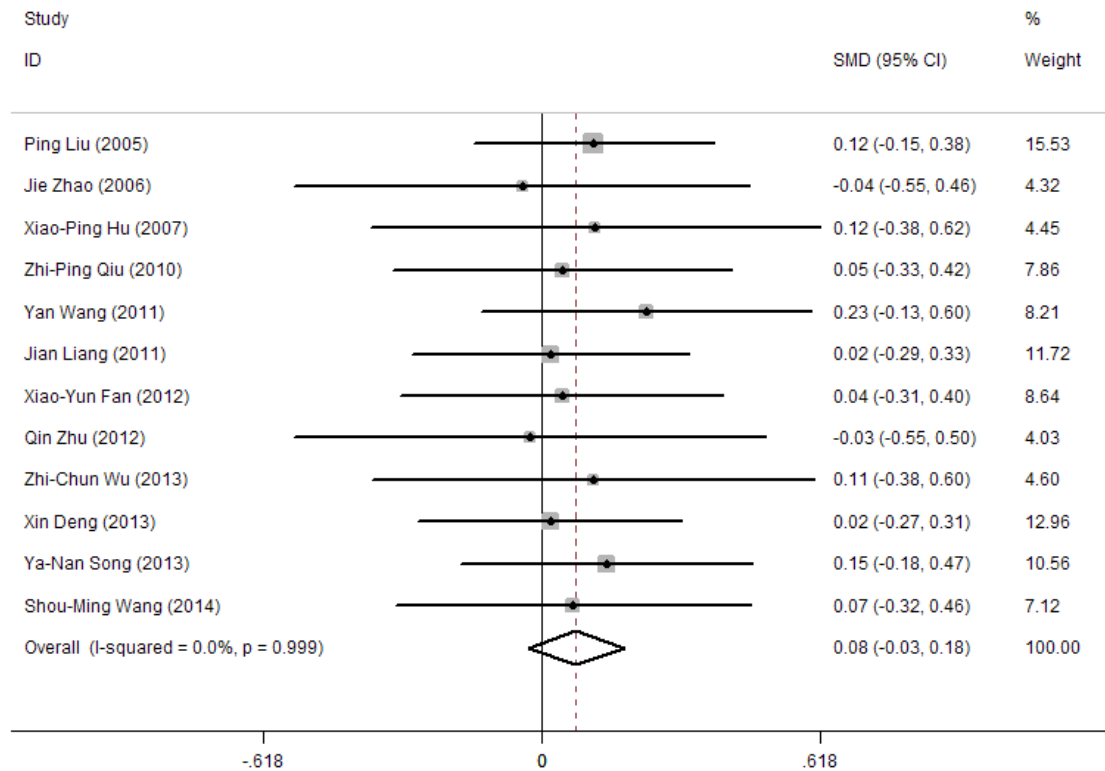

(e)

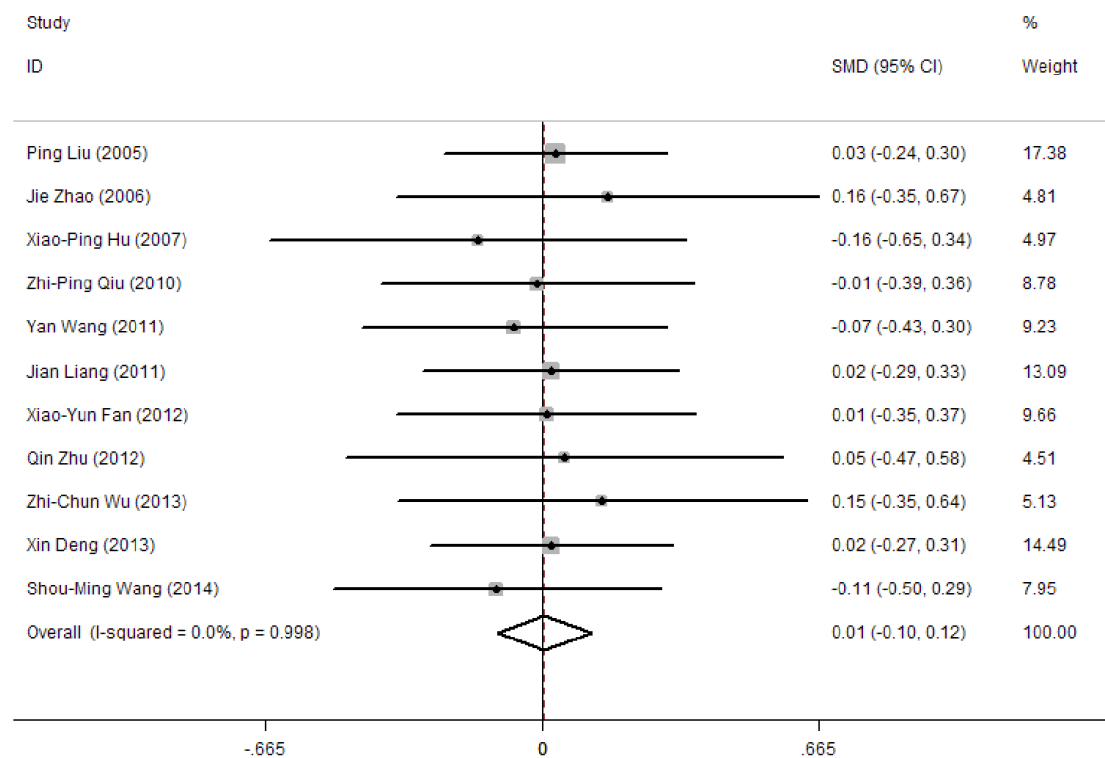

(f)

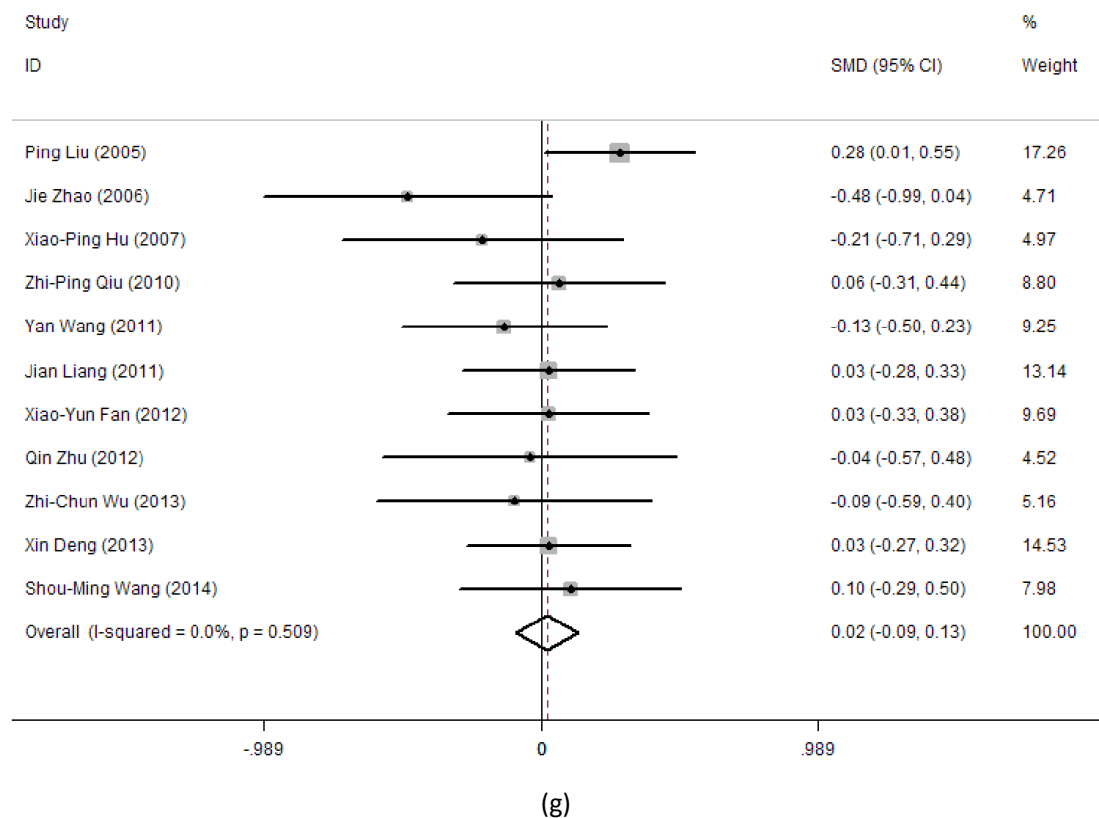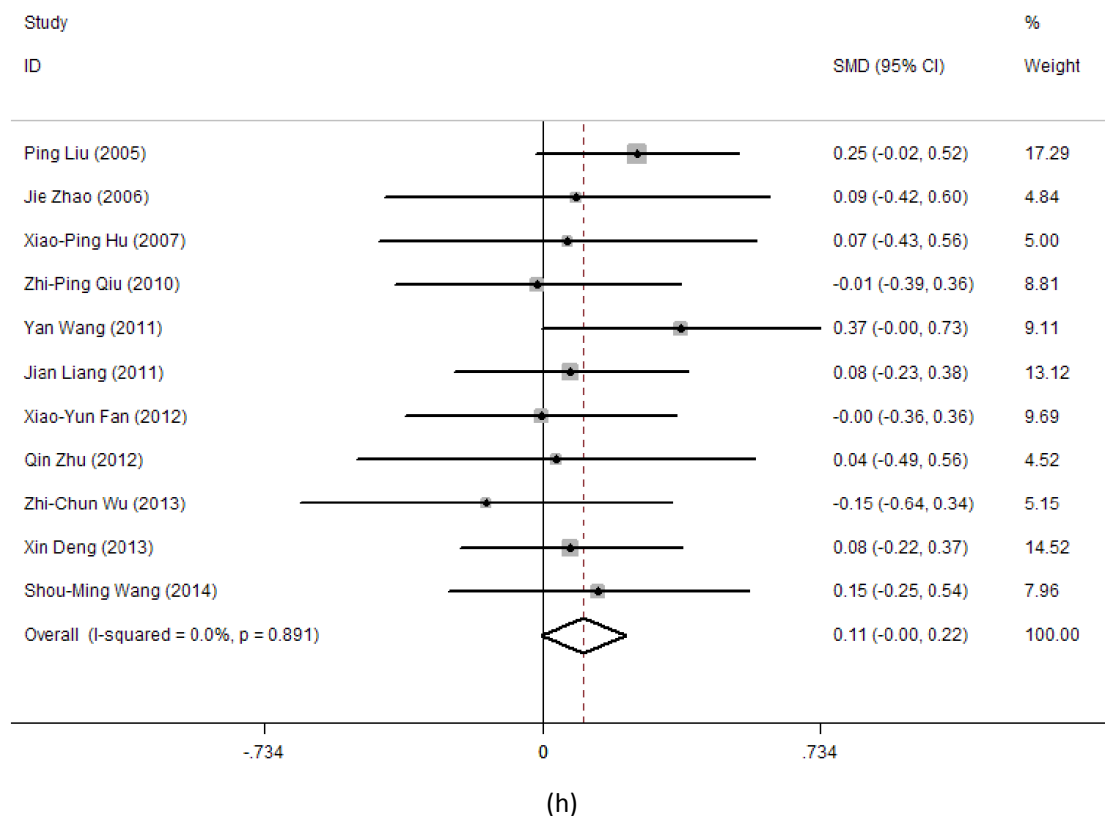

FIGURE 3: Forest plots of HA, LN, PC-III, VI-C before treatment. (e), HA, (f), LN, (g), PC-III, (h), VI-C.
